# Supplementary material for: Modelling absorption and emission of a meso-aniline–BODIPY based dye with molecular mechanics
Source: Royal Society of Chemistry journal article supplement (doi:10.1039/c8cp01877d), 2018-01-01
Supplement: c8cp01877d1.pdf [file c8cp01877d1.pdf]

Cite this: DOI: 10.1039/xxxxxxxxxx

# Modelling absorption and emission of a meso-aniline-BODIPY based dye with molecular mechanics†

Flip de Jong,<sup>a</sup> Milica Feldt,<sup>a</sup> Jonas Feldt,<sup>b</sup> and Jeremy N. Harvey<sup>\*a</sup>

## 1 Supporting Information

### 1.1 Basis set dependence

**Table 1** Gas phase excitation energies (in eV) to the locally excited (LE) state and the charge transfer (CT) state for N,N-dimethylaniline-BODIPY and the locally excited (LE) state for the BODIPY core calculated with CC2.

|             | BODIPY core |      | Aniline-BODIPY |
|-------------|-------------|------|----------------|
|             | LE          | LE   | CT             |
| cc-pVTZ     | 2.90        | 2.79 | 3.14           |
| aug-cc-pVTZ | 2.87        | 2.78 | 3.11           |

**Table 2** Absorption energies using the  $\omega$ B97X-D functional with continuum solvation models for ethanol (in eV) to the locally excited (LE) and charge transfer (CT) state for N,N-dimethylaniline-BODIPY.

|         | LE/def2-SVP | LE/cc-pVTZ | CT/def2-SVP | CT/cc-pVTZ |
|---------|-------------|------------|-------------|------------|
| LR-PCM  | 2.94        | 2.92       | 3.19        | 3.22       |
| cLR-PCM | 3.06        | 3.04       | 2.89        | 2.92       |
| SS-PCM  | 3.09        | 3.06       | 2.12        | 2.17       |

### 1.2 PCM results

### 1.3 Calculation of the shift term

The MM forcefields for the ground, LE and CT states return absolute values of the potential energies for given structures that are not meaningful. In order to obtain spectra, energy differences for a given structure must be corrected by adding a constant shift term:  $\Delta E = V_{\text{excited}}(R) - V_{\text{ground}}(R) + \lambda$ . As described in the text,  $\lambda$  was obtained both by fitting to the experimental spectrum, and by comparison to EOM-CCSD gas-phase calculations.

### 1.4 Force field parametrization

For the BODIPY molecule, the boron was modeled loosely on a quaternary carbon (84/13), but with a new class and type so as to get correct bond lengths and angles. The fluorine atoms were modeled as Alkyl Fluoride (786/1) and the two rings as pyrroles with alkane groups attached. The carbon in the mesoposition and

**Table 3** Absorption energies using  $\omega$ B97X-D/def2-SVP with continuum solvation models for ethanol, THF and toluene (in eV) to the locally excited (LE) and charge transfer (CT) state for N,N-dimethylaniline-BODIPY. cLE and cCT represent corrected energies for LE and CT respectively.

|         | LE   | cLE  | CT   | cCT  |
|---------|------|------|------|------|
| ethanol |      |      |      |      |
| LR-PCM  | 2.94 | 2.79 | 3.19 | 3.37 |
| cLR-PCM | 3.06 | 2.91 | 2.89 | 3.07 |
| SS-PCM  | 3.09 | 2.94 | 2.12 | 2.30 |
| THF     |      |      |      |      |
| LR-PCM  | 2.93 | 2.78 | 3.25 | 3.43 |
| cLR-PCM | 3.06 | 2.91 | 2.94 | 3.12 |
| SS-PCM  | 3.08 | 2.93 | 2.18 | 2.36 |
| toluene |      |      |      |      |
| LR-PCM  | 2.90 | 2.75 | 3.40 | 3.58 |
| cLR-PCM | 3.06 | 2.91 | 3.11 | 3.29 |
| SS-PCM  | 3.06 | 2.91 | 2.38 | 2.56 |

the aniline carbon bonded with this atom are based on a Biphenyl C1 (460/86). The rest of the aromatic ring are Aromatic C atoms (90/48), except for the carbon connected with the nitrogen, N-DiMe Aniline C-NR2 (748/48). The nitrogen is modeled on Amine R3N (732/44) and the methyl groups are again alkanes. We adjusted those types and classes in order to be able to adjust the bond length parameter for differing bonds separately.

### 1.5 Example of input files

#### Gaussian input file for the calculation of charges

```
%mem=50GB
%chk=LE.chk
#n int=ultrafine TD=(root=2) b3lyp/6-31+G(d,p)
scrf(solvent=ethanol,smd) pop=(ESP) iop(6/42=100) density=current geom(check) guess(read)
```

title

0 1

#### Molpro input file for EOM-CCSD calculations

```
memory,5000,m
basis=cc-pVDZ
geometry=bodipy.xyz
hf
```

<sup>a</sup> Division of Quantum Chemistry and Physical Chemistry, Department of Chemistry, Katholieke Universiteit Leuven, Celestijnenlaan 200F, 3001 Leuven, Belgium. E-mail: jeremy.harvey@kuleuven.be

<sup>b</sup> Institut für Physikalische Chemie, Georg-August-Universität, Tammannstr. 6, D-37077 Göttingen, Germany.

```
gprint,orbital
put,molden,bodipy.molden
ccsd
eom,1.3,1.4
```

#### Molpro input file for LCC2 calculations

```
memory,5000,m
gdirect
symmetry,nosym;orient,noorient
basis={default,cc-pVTZ
set,jkfit
default,cc-pVTZ/JKFIT
set,mp2fit
default,cc-pVTZ/MP2FIT
}
geometry=bodipy.xyz
hf
{!t-df-lcc2
eom,-5.1
eomprint,popul=-1,loceom=-1}
```

#### Gaussian input file for LR-PCM and SS-PCM

```
%chk=01-bodipy.chk
%mem=30GB
# wb97xd/cc-pVTZ Opt SCRF=(Solvent=Ethanol)

ground state

0 1

-link1-
%oldchk=01-bodipy.chk
%chk=02-bodipy.chk
%mem=30GB
# wb97xd/cc-pVTZ TD=NStates=6 SCRF=(Solvent=Ethanol)
Geom=Check Guess=Read
```

linear response vertical excited states

```
0 1

-link1-
%oldchk=01-bodipy.chk
%chk=03-bodipy.chk
%mem=30GB
# wb97xd/cc-pVTZ SCRF=(Solvent=Ethanol,Read)
Geom=Check Guess=Read
```

prepare for state-specific non-eq solvation by saving the solvent reaction field from the ground state

```
0 1

NonEq=write

-link1-
```

```
%chk=03-bodipy.chk
%mem=30GB
# wb97xd/cc-pVTZ TD(NStates=6,Root=1) Geom=Check
Guess=Read SCRF=(Solvent=Ethanol,ExternalIteration,Read)
```

read non-eq solvation from ground state and compute energy of the first excited with the state-specific method

```
0 1
```

```
NonEq=read
```

#### Gaussian input file for cLR-PCM

```
%oldchk=01-bodipy.chk
%chk=021-bodipy.chk
%mem=30GB
# wb97xd/cc-pVTZ TD=(NStates=6,Root=1,noneq)
SCRF=(pisa!r,Solvent=Ethanol) IOP(10/74=10) Geom=Check
Guess=Read
```

linear response vertical excited states

```
0 1
```

#### Parameters in ethanol Ground state (GS)

```
atom 907 120 B "Bodipy Boron atom" 5 10.811 4
atom 908 1 F "Bodipy Fluoride B-F" 9 18.998 1
atom 909 57 N "BODIPY N" 7 14.007 3
atom 910 84 C "Bodipy C2" 6 12.011 3
atom 911 87 C "Bodipy C3" 6 12.011 3
atom 912 87 C "Bodipy C4" 6 12.011 3
atom 913 121 C "Bodipy C5" 6 12.011 3
atom 914 86 C "Bodipy C6" 6 12.011 3
atom 915 86 C "AnilineB C" 6 12.011 3
atom 916 49 H "Bodipy HC" 1 1.008 1
atom 917 48 CA "Aromatic C under" 6 12.011 3
atom 919 44 NT "Amine R3N" 7 14.007 3
atom 920 13 CT "Amine CH3-NR2" 6 12.011 4
atom 921 48 CA "Aromatic C up" 6 12.011 3
atom 922 49 HA "Aromatic H-C up" 1 1.008 1
atom 923 49 HA "Aromatic H-C under" 1 1.008 1
atom 924 46 HC "Alkane H-C-N1" 1 1.008 1
atom 925 46 HC "Alkane H-C Bod up1" 1 1.008 1
atom 926 46 HC "Alkane H-C Bod under" 1 1.008 1
atom 927 46 HC "Alkane H-C-N2" 1 1.008 1
atom 928 46 HC "Alkane H-C Bod up2" 1 1.008 1
atom 929 13 CT "Alkane CH3-" 6 12.011 4
atom 930 13 CT "Alkane CH3-" 6 12.011 4
```

```
vdw 907 3.5000 0.0660
vdw 908 2.9400 0.0610
vdw 909 3.2500 0.1700
vdw 910 3.5500 0.0700
vdw 911 3.5500 0.0700
```

vdw 912 3.5500 0.0700  
vdw 913 3.5500 0.0700  
vdw 914 3.5500 0.0700  
vdw 915 3.5500 0.0700  
vdw 916 2.4200 0.0300  
vdw 917 3.5500 0.0700  
vdw 919 3.3000 0.1700  
vdw 920 3.5000 0.0660  
vdw 921 3.5500 0.0700  
vdw 922 2.4200 0.0300  
vdw 923 2.4200 0.0300  
vdw 924 2.5000 0.0300  
vdw 925 2.5000 0.0300  
vdw 926 2.5000 0.0300  
vdw 929 3.5000 0.0660  
vdw 930 3.5000 0.0660

charge 907 0.970  
charge 908 -0.486  
charge 909 -0.377  
charge 910 0.463  
charge 911 -0.544  
charge 912 0.193  
charge 913 -0.054  
charge 914 0.076  
charge 915 0.043  
charge 916 0.230  
charge 917 0.012  
charge 919 0.008  
charge 920 -0.249  
charge 921 -0.369  
charge 922 0.181  
charge 923 0.091  
charge 924 0.102  
charge 925 0.070  
charge 926 0.154  
charge 929 -0.218  
charge 930 -0.499  
charge 748 0.199

bond 1 120 400. 1.3944  
bond 57 120 300. 1.5572  
bond 86 86 385. 1.4936  
bond 121 86 385. 1.4052  
bond 121 57 385. 1.4002  
bond 121 87 546. 1.4351  
bond 84 87 546. 1.4096  
bond 87 87 469. 1.3904  
bond 57 84 427. 1.3469  
bond 84 13 317. 1.4942  
bond 87 13 317. 1.5007

angle 1 120 1 80. 110.  
angle 1 120 57 80. 110.  
angle 57 120 57 80. 106.  
angle 84 57 120 30. 125.

angle 87 84 87 0. 106.  
angle 87 87 13 63. 125.  
angle 86 121 87 70. 132.  
angle 87 121 57 70. 108.  
angle 121 57 120 30. 126.  
angle 121 86 121 63. 121.  
angle 121 86 86 63. 120.  
angle 57 121 86 70. 120.  
angle 121 57 84 70. 109.  
angle 121 87 87 70. 106.  
angle 13 87 121 70. 130.

torsion 1 120 57 84 0.000 0.0 1 0.000 0.0 1 0.000 0.0 3  
torsion 57 120 57 84 0.000 0.0 1 2.170 180.0 2 0.000 0.0 3  
torsion 84 87 87 49 0.000 0.0 1 2.170 180.0 2 0.000 0.0 3  
torsion 49 87 87 13 0.000 0.0 1 0.000 0.0 1 0.000 0.0 3  
torsion 84 87 87 13 0.000 0.0 1 2.170 180.0 2 0.000 0.0 3  
torsion 121 87 87 84 0.000 0.0 1 2.170 180.0 2 0.000 0.0 3  
torsion 57 121 86 86 0.000 0.0 1 2.170 180.0 2 0.000 0.0 3  
torsion 86 86 121 87 0.000 0.0 1 0.000 0.0 1 0.000 0.0 3  
torsion 57 121 86 121 0.000 0.0 1 0.000 0.0 1 0.000 0.0 3  
torsion 87 121 86 121 0.000 0.0 1 2.170 180.0 2 0.000 0.0 3  
torsion 87 121 57 84 0.000 0.0 1 0 000 0.0 1 0.000 0.0 3  
torsion 87 121 57 120 0.000 0.0 1 2.170 180.0 2 0.000 0.0 3  
torsion 87 87 121 86 0.000 0.0 1 2.170 180.0 2 0.000 0.0 3  
torsion 86 121 87 87 0.000 0.0 1 2.170 180.0 2 0.000 0.0 3  
torsion 86 121 87 13 0.000 0.0 1 0.000 0.0 1 0.000 0.0 3  
torsion 57 121 87 87 0.000 0.0 1 0.000 0.0 1 0.000 0.0 3  
torsion 57 121 87 13 0.000 0.0 1 2.170 180.0 2 0.000 0.0 3  
torsion 121 57 120 1 0.000 0.0 1 1.970 90.0 4 0.000 0.0 3  
torsion 121 86 86 48 0.000 0.0 1 1.970 90.0 4 0.000 0.0 3  
torsion 57 120 57 121 0.000 0.0 1 0 000 0.0 1 0.000 0.0 3  
torsion 120 57 121 87 0.000 0.0 1 2.170 180.0 2 0.000 0.0 3  
torsion 120 57 121 86 0.000 0.0 1 0.000 0.0 1 0.000 0.0 3  
torsion 49 87 87 121 0.000 0.0 1 2.170 180.0 2 0.000 0.0 3  
torsion 86 121 57 84 0.000 0.0 1 2.170 180.0 2 0.000 0.0 3

#### Locally excited state (LE)

atom 907 120 B "Bodipy Boron atom" 5 10.811 4  
atom 908 1 F "Bodipy Fluoride B-F" 9 18.998 1  
atom 909 57 N "BODIPY N" 7 14.007 3  
atom 910 84 C "Bodipy C2" 6 12.011 3  
atom 911 87 C "Bodipy C3" 6 12.011 3  
atom 912 87 C "Bodipy C4" 6 12.011 3  
atom 913 121 C "Bodipy C5" 6 12.011 3  
atom 914 86 C "Bodipy C6" 6 12.011 3  
atom 915 86 C "AnilineB C" 6 12.011 3  
atom 916 49 H "Bodipy HC" 1 1.008 1  
atom 917 48 CA "Aromatic C under" 6 12.011 3  
atom 919 44 NT "Amine R3N" 7 14.007 3  
atom 920 13 CT "Amine CH3-NR2" 6 12.011 4  
atom 921 48 CA "Aromatic C up" 6 12.011 3  
atom 922 49 HA "Aromatic H-C up" 1 1.008 1  
atom 923 49 HA "Aromatic H-C under" 1 1.008 1  
atom 924 46 HC "Alkane H-C-N1" 1 1.008 1

atom 925 46 HC "Alkane H-C Bod up1" 1 1.008 1  
atom 926 46 HC "Alkane H-C Bod under" 1 1.008 1  
atom 927 46 HC "Alkane H-C-N2" 1 1.008 1  
atom 928 46 HC "Alkane H-C Bod up2" 1 1.008 1  
atom 929 13 CT "Alkane CH3-" 6 12.011 4  
atom 930 13 CT "Alkane CH3-" 6 12.011 4

vdw 907 3.5000 0.0660  
vdw 908 2.9400 0.0610  
vdw 909 3.2500 0.1700  
vdw 910 3.5500 0.0700  
vdw 911 3.5500 0.0700  
vdw 912 3.5500 0.0700  
vdw 913 3.5500 0.0700  
vdw 914 3.5500 0.0700  
vdw 915 3.5500 0.0700  
vdw 916 2.4200 0.0300  
vdw 917 3.5500 0.0700  
vdw 919 3.3000 0.1700  
vdw 920 3.5000 0.0660  
vdw 921 3.5500 0.0700  
vdw 922 2.4200 0.0300  
vdw 923 2.4200 0.0300  
vdw 924 2.5000 0.0300  
vdw 925 2.5000 0.0300  
vdw 926 2.5000 0.0300  
vdw 927 2.5000 0.0300  
vdw 928 2.5000 0.0300  
vdw 929 3.5000 0.0660  
vdw 930 3.5000 0.0660

charge 907 0.986  
charge 908 -0.492  
charge 909 -0.430  
charge 910 0.452  
charge 911 -0.512  
charge 912 0.122  
charge 913 0.138  
charge 914 -0.162  
charge 915 0.127  
charge 916 0.233  
charge 917 0.004  
charge 919 0.016  
charge 920 -0.253  
charge 921 -0.383  
charge 922 0.183  
charge 923 0.086  
charge 924 0.102  
charge 925 0.065  
charge 926 0.158  
charge 929 -0.2085  
charge 930 -0.497  
charge 748 0.198

bond 1 120 400. 1.4001  
bond 57 120 300. 1.5448

bond 121 86 385. 1.4224  
bond 86 86 385. 1.4892  
bond 57 84 427. 1.3501  
bond 84 87 546. 1.4180  
bond 87 87 469. 1.3963  
bond 121 57 385. 1.4171  
bond 121 87 546. 1.4349

angle 1 120 1 80. 110.  
angle 1 120 57 80. 110.  
angle 57 120 57 80. 106.  
angle 84 57 120 30. 124.  
angle 87 87 13 63. 125.  
angle 86 121 87 70. 131.  
angle 87 121 57 70. 108.  
angle 121 57 120 30. 127.  
angle 121 86 121 63. 119.  
angle 121 86 86 63. 121.  
angle 57 121 86 70. 121.  
angle 121 57 84 70. 109.  
angle 121 87 87 70. 106.  
angle 13 87 121 70. 129.

torsion 1 120 57 84 0.000 0.0 1 0.000 0.0 1 0.000 0.0 3  
torsion 57 120 57 84 0.000 0.0 1 2.170 180.0 2 0.000 0.0 3  
torsion 84 87 87 49 0.000 0.0 1 2.170 180.0 2 0.000 0.0 3  
torsion 49 87 87 13 0.000 0.0 1 0.000 0.0 1 0.000 0.0 3  
torsion 84 87 87 13 0.000 0.0 1 2.170 180.0 2 0.000 0.0 3  
torsion 121 87 87 84 0.000 0.0 1 2.170 180.0 2 0.000 0.0 3  
torsion 57 121 86 86 0.000 0.0 1 2.170 180.0 2 0.000 0.0 3  
torsion 86 86 121 87 0.000 0.0 1 0.000 0.0 1 0.000 0.0 3  
torsion 57 121 86 121 0.000 0.0 1 0.000 0.0 1 0.000 0.0 3  
torsion 87 121 86 121 0.000 0.0 1 2.170 180.0 2 0.000 0.0 3  
torsion 87 121 57 84 0.000 0.0 1 0.000 0.0 1 0.000 0.0 3  
torsion 87 121 57 120 0.000 0.0 1 2.170 180.0 2 0.000 0.0 3  
torsion 87 87 121 86 0.000 0.0 1 2.170 180.0 2 0.000 0.0 3  
torsion 86 121 87 87 0.000 0.0 1 2.170 180.0 2 0.000 0.0 3  
torsion 86 121 87 13 0.000 0.0 1 0.000 0.0 1 0.000 0.0 3  
torsion 57 121 87 87 0.000 0.0 1 0.000 0.0 1 0.000 0.0 3  
torsion 57 121 87 13 0.000 0.0 1 2.170 180.0 2 0.000 0.0 3  
torsion 121 57 120 1 0.000 0.0 1 1.970 90.0 4 0.000 0.0 3  
torsion 121 86 86 48 0.000 0.0 1 1.970 90.0 4 0.000 0.0 3  
torsion 57 120 57 121 0.000 0.0 1 0.000 0.0 1 0.000 0.0 3  
torsion 120 57 121 87 0.000 0.0 1 2.170 180.0 2 0.000 0.0 3  
torsion 120 57 121 86 0.000 0.0 1 0.000 0.0 1 0.000 0.0 3  
torsion 49 87 87 121 0.000 0.0 1 2.170 180.0 2 0.000 0.0 3  
torsion 86 121 57 84 0.000 0.0 1 2.170 180.0 2 0.000 0.0 3

#### Charge transfer state (CT)

atom 907 120 B "Bodipy Boron atom" 5 10.811 4  
atom 908 1 F "Bodipy Fluoride B-F" 9 18.998 1  
atom 909 57 N "BODIPY N" 7 14.007 3  
atom 910 84 C "Bodipy C2" 6 12.011 3  
atom 911 87 C "Bodipy C3" 6 12.011 3  
atom 912 87 C "Bodipy C4" 6 12.011 3

atom 913 121 C "Bodipy C5" 6 12.011 3  
atom 914 86 C "Bodipy C6" 6 12.011 3  
atom 915 86 C "AnilineB C" 6 12.011 3  
atom 916 49 H "Bodipy HC" 1 1.008 1  
atom 917 48 CA "Aromatic C under" 6 12.011 3  
atom 919 44 NT "Amine R3N" 7 14.007 3  
atom 920 13 CT "Amine CH3-NR2" 6 12.011 4  
atom 921 48 CA "Aromatic C up" 6 12.011 3  
atom 922 49 HA "Aromatic H-C up" 1 1.008 1  
atom 923 49 HA "Aromatic H-C under" 1 1.008 1  
atom 924 46 HC "Alkane H-C-N" 1 1.008 1  
atom 925 46 HC "Alkane H-C Bod up1" 1 1.008 1  
atom 926 46 HC "Alkane H-C Bod under" 1 1.008 1  
atom 927 46 HC "Alkane H-C-N2" 1 1.008 1  
atom 928 46 HC "Alkane H-C Bod up2" 1 1.008 1  
atom 929 13 CT "Alkane CH3-" 6 12.011 4  
atom 930 13 CT "Alkane CH3-" 6 12.011 4  
atom 931 49 H "Link H Aniline" 1 1.008 1  
atom 932 49 H "Link H Bodipy" 1 1.008 1  
atom 748 122 CA "N-DiMe Aniline C-NR2" 6 12.011 3

vdw 907 3.5000 0.0660  
vdw 908 2.9400 0.0610  
vdw 909 3.2500 0.1700  
vdw 910 3.5500 0.0700  
vdw 911 3.5500 0.0700  
vdw 912 3.5500 0.0700  
vdw 913 3.5500 0.0700  
vdw 914 3.5500 0.0700  
vdw 915 3.5500 0.0700  
vdw 916 2.4200 0.0300  
vdw 917 3.5500 0.0700  
vdw 919 3.3000 0.1700  
vdw 920 3.5000 0.0660  
vdw 921 3.5500 0.0700  
vdw 922 2.4200 0.0300  
vdw 923 2.4200 0.0300  
vdw 924 2.5000 0.0300  
vdw 925 2.5000 0.0300  
vdw 926 2.5000 0.0300  
vdw 927 2.5000 0.0300  
vdw 928 2.5000 0.0300  
vdw 929 3.5000 0.0660  
vdw 930 3.5000 0.0660

charge 907 1.120  
charge 908 -0.544  
charge 909 -0.382  
charge 910 0.262  
charge 911 -0.552  
charge 912 0.097  
charge 913 0.038  
charge 914 -0.231  
charge 915 0.146  
charge 916 0.217  
charge 917 -0.141

charge 919 0.144  
charge 920 -0.276  
charge 921 -0.161  
charge 922 0.180  
charge 923 0.166  
charge 924 0.1545  
charge 925 0.053  
charge 926 0.1225  
charge 929 -0.179  
charge 930 -0.428  
charge 748 0.247

bond 1 120 400. 1.4134  
bond 57 120 300. 1.5474  
bond 86 86 385. 1.4936  
bond 121 86 385. 1.4131  
bond 121 57 385. 1.3930  
bond 121 87 546. 1.4137  
bond 84 87 546. 1.3899  
bond 87 87 469. 1.4162  
bond 57 84 427. 1.3746  
bond 84 13 317. 1.4967  
bond 87 13 317. 1.5003  
bond 48 86 469. 1.4081  
bond 48 48 469. 1.3787  
bond 48 122 469. 1.4337  
bond 44 122 481. 1.3591  
bond 13 44 382. 1.4725

angle 1 120 1 80. 110.  
angle 1 120 57 80. 110.  
angle 57 120 57 80. 104.  
angle 84 57 120 30. 121.  
angle 87 84 87 0. 106.  
angle 84 86 84 63. 117.  
angle 84 86 86 63. 121.  
angle 87 87 13 63. 122.  
angle 86 121 87 70. 132.  
angle 87 121 57 70. 108.  
angle 121 57 120 30. 121.  
angle 87 121 87 70. 106.  
angle 121 86 121 63. 117.  
angle 121 86 86 63. 121.  
angle 57 121 86 70. 121.  
angle 121 57 84 70. 109.  
angle 121 87 87 70. 107.  
angle 13 87 121 70. 125.  
angle 48 86 49 35. 120.  
angle 121 86 49 63. 121.  
angle 122 48 48 63. 120.  
angle 48 122 48 63. 120.  
angle 122 48 49 35. 120.  
angle 44 122 48 70. 120.  
angle 13 44 122 50. 116.

torsion 1 120 57 84 0.000 0.0 1 0.000 0.0 1 0.000 0.0 3

torsion 57 120 57 84 0.000 0.0 1 2.170 180.0 2 0.000 0.0 3  
torsion 84 87 87 49 0.000 0.0 1 2.170 180.0 2 0.000 0.0 3  
torsion 49 87 87 13 0.000 0.0 1 0.000 0.0 1 0.000 0.0 3  
torsion 84 87 87 13 0.000 0.0 1 2.170 180.0 2 0.000 0.0 3  
torsion 121 87 87 84 0.000 0.0 1 2.170 180.0 2 0.000 0.0 3  
torsion 57 121 86 86 0.000 0.0 1 2.170 180.0 2 0.000 0.0 3  
torsion 86 86 121 87 0.000 0.0 1 0.000 0.0 1 0.000 0.0 3  
torsion 57 121 86 121 0.000 0.0 1 0.000 0.0 1 0.000 0.0 3  
torsion 87 121 86 121 0.000 0.0 1 2.170 180.0 2 0.000 0.0 3  
torsion 87 121 57 84 0.000 0.0 1 0.000 0.0 1 0.000 0.0 3  
torsion 87 121 57 120 0.000 0.0 1 2.170 180.0 2 0.000 0.0 3  
torsion 87 87 121 86 0.000 0.0 1 2.170 180.0 2 0.000 0.0 3  
torsion 86 121 87 87 0.000 0.0 1 2.170 180.0 2 0.000 0.0 3  
torsion 86 121 87 13 0.000 0.0 1 0.000 0.0 1 0.000 0.0 3  
torsion 57 121 87 87 0.000 0.0 1 0.000 0.0 1 0.000 0.0 3  
torsion 57 121 87 13 0.000 0.0 1 2.170 180.0 2 0.000 0.0 3  
torsion 121 57 120 1 0.000 0.0 1 1.970 90.0 4 0.000 0.0 3  
torsion 121 86 86 48 0.000 0.0 1 1.970 90.0 4 0.000 0.0 3  
torsion 57 120 57 121 0.000 0.0 1 0.000 0.0 1 0.000 0.0 3  
torsion 120 57 121 87 0.000 0.0 1 2.170 180.0 2 0.000 0.0 3  
torsion 120 57 121 86 0.000 0.0 1 0.000 0.0 1 0.000 0.0 3  
torsion 49 87 87 121 0.000 0.0 1 2.170 180.0 2 0.000 0.0 3  
torsion 86 121 57 84 0.000 0.0 1 2.170 180.0 2 0.000 0.0 3  
torsion 49 48 86 49 0.000 0.0 1 7.250 180.0 2 0.000 0.0 3  
torsion 48 48 86 49 0.000 0.0 1 7.250 180.0 2 0.000 0.0 3  
torsion 57 121 86 49 0.000 0.0 1 2.170 180.0 2 0.000 0.0 3  
torsion 49 86 121 87 0.000 0.0 1 0.000 0.0 1 0.000 0.0 3  
torsion 48 48 122 48 0.000 0.0 1 7.250 180.0 2 0.000 0.0 3  
torsion 44 122 48 49 0.000 0.0 1 7.250 180.0 2 0.000 0.0 3  
torsion 13 44 122 48 -7.582 0.0 1 3.431 180.0 2 3.198 0.0 3  
torsion 46 13 44 122 0.000 0.0 1 0.000 180.0 2 0.560 0.0 3  
torsion 48 48 122 49 0.000 0.0 1 7.250 180.0 2 0.000 0.0 3  
torsion 48 48 122 44 0.000 0.0 1 7.250 180.0 2 0.000 0.0 3  
torsion 48 122 48 49 0.000 0.0 1 7.250 180.0 2 0.000 0.0 3

#### Additional parameters in THF and toluene Ground state (GS)

atom 907 120 B "Bodipy Boron atom" 5 10.811 4  
atom 908 1 F "Bodipy Fluoride B-F" 9 18.998 1  
atom 909 57 N "BODIPY N" 7 14.007 3  
atom 910 84 C "Bodipy C2" 6 12.011 3  
atom 911 87 C "Bodipy C3" 6 12.011 3  
atom 912 87 C "Bodipy C4" 6 12.011 3  
atom 913 121 C "Bodipy C5" 6 12.011 3  
atom 914 86 C "Bodipy C6" 6 12.011 3  
atom 915 86 C "AnilineB C" 6 12.011 3  
atom 916 49 H "Bodipy HC" 1 1.008 1  
atom 917 48 CA "Aromatic C under" 6 12.011 3  
atom 919 44 NT "Amine R3N" 7 14.007 3  
atom 920 13 CT "Amine CH3-NR2" 6 12.011 4  
atom 921 48 CA "Aromatic C up" 6 12.011 3  
atom 922 49 HA "Aromatic H-C up" 1 1.008 1  
atom 923 49 HA "Aromatic H-C under" 1 1.008 1  
atom 924 46 HC "Alkane H-C-N1" 1 1.008 1  
atom 925 46 HC "Alkane H-C Bod up1" 1 1.008 1

atom 926 46 HC "Alkane H-C Bod under" 1 1.008 1  
atom 927 46 HC "Alkane H-C-N2" 1 1.008 1  
atom 928 46 HC "Alkane H-C Bod up2" 1 1.008 1  
atom 929 13 CT "Alkane CH3-" 6 12.011 4  
atom 930 13 CT "Alkane CH3-" 6 12.011 4

vdw 907 3.5000 0.0660  
vdw 908 2.9400 0.0610  
vdw 909 3.2500 0.1700  
vdw 910 3.5500 0.0700  
vdw 911 3.5500 0.0700  
vdw 912 3.5500 0.0700  
vdw 913 3.5500 0.0700  
vdw 914 3.5500 0.0700  
vdw 915 3.5500 0.0700  
vdw 916 2.4200 0.0300  
vdw 917 3.5500 0.0700  
vdw 919 3.3000 0.1700  
vdw 920 3.5000 0.0660  
vdw 921 3.5500 0.0700  
vdw 922 2.4200 0.0300  
vdw 923 2.4200 0.0300  
vdw 924 2.5000 0.0300  
vdw 925 2.5000 0.0300  
vdw 926 2.5000 0.0300  
vdw 929 3.5000 0.0660  
vdw 930 3.5000 0.0660

charge 907 0.970  
charge 908 -0.486  
charge 909 -0.377  
charge 910 0.463  
charge 911 -0.544  
charge 912 0.193  
charge 913 -0.054  
charge 914 0.076  
charge 915 0.043  
charge 916 0.230  
charge 917 0.012  
charge 919 0.008  
charge 920 -0.249  
charge 921 -0.369  
charge 922 0.181  
charge 923 0.091  
charge 924 0.102  
charge 925 0.070  
charge 926 0.154  
charge 929 -0.218  
charge 930 -0.499  
charge 748 0.199

bond 1 120 400. 1.3944  
bond 57 120 300. 1.5572  
bond 86 86 385. 1.4936  
bond 121 86 385. 1.4052  
bond 121 57 385. 1.4002

bond 121 87 546. 1.4351  
bond 84 87 546. 1.4096  
bond 87 87 469. 1.3904  
bond 57 84 427. 1.3469  
bond 84 13 317. 1.4942  
bond 87 13 317. 1.5007

angle 1 120 1 80. 110.  
angle 1 120 57 80. 110.  
angle 57 120 57 80. 106.  
angle 84 57 120 30. 125.  
angle 87 84 87 0. 106.  
angle 87 87 13 63. 125.  
angle 86 121 87 70. 132.  
angle 87 121 57 70. 108.  
angle 121 57 120 30. 126.  
angle 121 86 121 63. 121.  
angle 121 86 86 63. 120.  
angle 57 121 86 70. 120.  
angle 121 57 84 70. 109.  
angle 121 87 87 70. 106.  
angle 13 87 121 70. 130.

restrain-torsion 121 86 86 48 1.0 87 93

torsion 1 120 57 84 0.000 0.0 1 7.170 180.0 2 0.000 0.0 3  
torsion 57 120 57 84 0.000 0.0 1 7.170 180.0 2 0.000 0.0 3  
torsion 84 87 87 49 0.000 0.0 1 7.170 180.0 2 0.000 0.0 3  
torsion 49 87 87 13 0.000 0.0 1 7.170 180.0 2 0.000 0.0 3  
torsion 84 87 87 13 0.000 0.0 1 7.170 180.0 2 0.000 0.0 3  
torsion 121 87 87 84 0.000 0.0 1 7.170 180.0 2 0.000 0.0 3  
torsion 57 121 86 86 0.000 0.0 1 7.170 180.0 2 0.000 0.0 3  
torsion 86 86 121 87 0.000 0.0 1 2.170 180.0 2 0.000 0.0 3  
torsion 57 121 86 121 0.000 0.0 1 7.170 180.0 2 0.000 0.0 3  
torsion 87 121 86 121 0.000 0.0 1 7.170 180.0 2 0.000 0.0 3  
torsion 87 121 57 84 0.000 0.0 1 7.170 180.0 2 0.000 0.0 3  
torsion 87 121 57 120 0.000 0.0 1 7.170 180.0 2 0.000 0.0 3  
torsion 87 87 121 86 0.000 0.0 1 7.170 180.0 2 0.000 0.0 3  
torsion 86 121 87 87 0.000 0.0 1 7.170 180.0 2 0.000 0.0 3  
torsion 86 121 87 13 0.000 0.0 1 7.170 180.0 2 0.000 0.0 3  
torsion 57 121 87 87 0.000 0.0 1 7.170 180.0 2 0.000 0.0 3  
torsion 57 121 87 13 0.000 0.0 1 7.170 180.0 2 0.000 0.0 3  
torsion 121 57 120 1 0.000 0.0 1 7.170 180.0 2 0.000 0.0 3  
torsion 121 86 86 48 0.000 0.0 1 2.170 180.0 2 0.000 0.0 3  
torsion 57 120 57 121 0.000 0.0 1 7.170 180.0 2 0.000 0.0 3  
torsion 120 57 121 87 0.000 0.0 1 7.170 180.0 2 0.000 0.0 3  
torsion 120 57 121 86 0.000 0.0 1 7.170 180.0 2 0.000 0.0 3  
torsion 49 87 87 121 0.000 0.0 1 7.170 180.0 2 0.000 0.0 3  
torsion 86 121 57 84 0.000 0.0 1 7.170 180.0 2 0.000 0.0 3

#### Locally excited state (LE)

atom 907 120 B "Bodipy Boron atom" 5 10.811 4  
atom 908 1 F "Bodipy Fluoride B-F" 9 18.998 1  
atom 909 57 N "BODIPY N" 7 14.007 3  
atom 910 84 C "Bodipy C2" 6 12.011 3

atom 911 87 C "Bodipy C3" 6 12.011 3  
atom 912 87 C "Bodipy C4" 6 12.011 3  
atom 913 121 C "Bodipy C5" 6 12.011 3  
atom 914 86 C "Bodipy C6" 6 12.011 3  
atom 915 86 C "AnilineB C" 6 12.011 3  
atom 916 49 H "Bodipy HC" 1 1.008 1  
atom 917 48 CA "Aromatic C under" 6 12.011 3  
atom 919 44 NT "Amine R3N" 7 14.007 3  
atom 920 13 CT "Amine CH3-NR2" 6 12.011 4  
atom 921 48 CA "Aromatic C up" 6 12.011 3  
atom 922 49 HA "Aromatic H-C up" 1 1.008 1  
atom 923 49 HA "Aromatic H-C under" 1 1.008 1  
atom 924 46 HC "Alkane H-C-N1" 1 1.008 1  
atom 925 46 HC "Alkane H-C Bod up1" 1 1.008 1  
atom 926 46 HC "Alkane H-C Bod under" 1 1.008 1  
atom 927 46 HC "Alkane H-C-N2" 1 1.008 1  
atom 928 46 HC "Alkane H-C Bod up2" 1 1.008 1  
atom 929 13 CT "Alkane CH3-" 6 12.011 4  
atom 930 13 CT "Alkane CH3-" 6 12.011 4

vdw 907 3.5000 0.0660  
vdw 908 2.9400 0.0610  
vdw 909 3.2500 0.1700  
vdw 910 3.5500 0.0700  
vdw 911 3.5500 0.0700  
vdw 912 3.5500 0.0700  
vdw 913 3.5500 0.0700  
vdw 914 3.5500 0.0700  
vdw 915 3.5500 0.0700  
vdw 916 2.4200 0.0300  
vdw 917 3.5500 0.0700  
vdw 919 3.3000 0.1700  
vdw 920 3.5000 0.0660  
vdw 921 3.5500 0.0700  
vdw 922 2.4200 0.0300  
vdw 923 2.4200 0.0300  
vdw 924 2.5000 0.0300  
vdw 925 2.5000 0.0300  
vdw 926 2.5000 0.0300  
vdw 927 2.5000 0.0300  
vdw 928 2.5000 0.0300  
vdw 929 3.5000 0.0660  
vdw 930 3.5000 0.0660

charge 907 0.986  
charge 908 -0.492  
charge 909 -0.430  
charge 910 0.452  
charge 911 -0.512  
charge 912 0.122  
charge 913 0.138  
charge 914 -0.162  
charge 915 0.127  
charge 916 0.233  
charge 917 0.004  
charge 919 0.016

charge 920 -0.253  
charge 921 -0.383  
charge 922 0.183  
charge 923 0.086  
charge 924 0.102  
charge 925 0.065  
charge 926 0.158  
charge 929 -0.2085  
charge 930 -0.497  
charge 748 0.198

bond 1 120 400. 1.4001  
bond 57 120 300. 1.5448  
bond 121 86 385. 1.4224  
bond 86 86 385. 1.4892  
bond 57 84 427. 1.3501  
bond 84 87 546. 1.4180  
bond 87 87 469. 1.3963  
bond 121 57 385. 1.4171  
bond 121 87 546. 1.4349

angle 1 120 1 80. 110.  
angle 1 120 57 80. 110.  
angle 57 120 57 80. 106.  
angle 84 57 120 30. 124.  
angle 87 87 13 63. 125.  
angle 86 121 87 70. 131.  
angle 87 121 57 70. 108.  
angle 121 57 120 30. 127.  
angle 121 86 121 63. 119.  
angle 121 86 86 63. 121.  
angle 57 121 86 70. 121.  
angle 121 57 84 70. 109.  
angle 121 87 87 70. 106.  
angle 13 87 121 70. 129.

restrain-torsion 121 86 86 48 1.0 87 93

torsion 1 120 57 84 0.000 0.0 1 7.170 180.0 2 0.000 0.0 3  
torsion 57 120 57 84 0.000 0.0 1 7.170 180.0 2 0.000 0.0 3  
torsion 84 87 87 49 0.000 0.0 1 7.170 180.0 2 0.000 0.0 3  
torsion 49 87 87 13 0.000 0.0 1 7.170 180.0 2 0.000 0.0 3  
torsion 84 87 87 13 0.000 0.0 1 7.170 180.0 2 0.000 0.0 3  
torsion 121 87 87 84 0.000 0.0 1 7.170 180.0 2 0.000 0.0 3  
torsion 57 121 86 86 0.000 0.0 1 7.170 180.0 2 0.000 0.0 3  
torsion 86 86 121 87 0.000 0.0 1 2.170 180.0 2 0.000 0.0 3  
torsion 57 121 86 121 0.000 0.0 1 7.170 180.0 2 0.000 0.0 3  
torsion 87 121 86 121 0.000 0.0 1 7.170 180.0 2 0.000 0.0 3  
torsion 87 121 57 84 0.000 0.0 1 7.170 180.0 2 0.000 0.0 3  
torsion 87 121 57 120 0.000 0.0 1 7.170 180.0 2 0.000 0.0 3  
torsion 87 87 121 86 0.000 0.0 1 7.170 180.0 2 0.000 0.0 3  
torsion 86 121 87 87 0.000 0.0 1 7.170 180.0 2 0.000 0.0 3  
torsion 86 121 87 13 0.000 0.0 1 7.170 180.0 2 0.000 0.0 3  
torsion 57 121 87 87 0.000 0.0 1 7.170 180.0 2 0.000 0.0 3  
torsion 57 121 87 13 0.000 0.0 1 7.170 180.0 2 0.000 0.0 3  
torsion 121 57 120 1 0.000 0.0 1 7.170 180.0 2 0.000 0.0 3

torsion 121 86 86 48 0.000 0.0 1 2.170 180.0 2 0.000 0.0 3  
torsion 57 120 57 121 0.000 0.0 1 7.170 180.0 2 0.000 0.0 3  
torsion 120 57 121 87 0.000 0.0 1 7.170 180.0 2 0.000 0.0 3  
torsion 120 57 121 86 0.000 0.0 1 7.170 180.0 2 0.000 0.0 3  
torsion 49 87 87 121 0.000 0.0 1 7.170 180.0 2 0.000 0.0 3  
torsion 86 121 57 84 0.000 0.0 1 7.170 180.0 2 0.000 0.0 3

#### Charge transfer state (CT)

atom 907 120 B "Bodipy Boron atom" 5 10.811 4  
atom 908 1 F "Bodipy Fluoride B-F" 9 18.998 1  
atom 909 57 N "BODIPY N" 7 14.007 3  
atom 910 84 C "Bodipy C2" 6 12.011 3  
atom 911 87 C "Bodipy C3" 6 12.011 3  
atom 912 87 C "Bodipy C4" 6 12.011 3  
atom 913 121 C "Bodipy C5" 6 12.011 3  
atom 914 86 C "Bodipy C6" 6 12.011 3  
atom 915 86 C "AnilineB C" 6 12.011 3  
atom 916 49 H "Bodipy HC" 1 1.008 1  
atom 917 48 CA "Aromatic C under" 6 12.011 3  
atom 919 44 NT "Amine R3N" 7 14.007 3  
atom 920 13 CT "Amine CH3-NR2" 6 12.011 4  
atom 921 48 CA "Aromatic C up" 6 12.011 3  
atom 922 49 HA "Aromatic H-C up" 1 1.008 1  
atom 923 49 HA "Aromatic H-C under" 1 1.008 1  
atom 924 46 HC "Alkane H-C-N" 1 1.008 1  
atom 925 46 HC "Alkane H-C Bod up1" 1 1.008 1  
atom 926 46 HC "Alkane H-C Bod under" 1 1.008 1  
atom 927 46 HC "Alkane H-C-N2" 1 1.008 1  
atom 928 46 HC "Alkane H-C Bod up2" 1 1.008 1  
atom 929 13 CT "Alkane CH3-" 6 12.011 4  
atom 930 13 CT "Alkane CH3-" 6 12.011 4  
atom 931 49 H "Link H Aniline" 1 1.008 1  
atom 932 49 H "Link H Bodipy" 1 1.008 1  
atom 748 122 CA "N-DiMe Aniline C-NR2" 6 12.011 3

vdw 907 3.5000 0.0660  
vdw 908 2.9400 0.0610  
vdw 909 3.2500 0.1700  
vdw 910 3.5500 0.0700  
vdw 911 3.5500 0.0700  
vdw 912 3.5500 0.0700  
vdw 913 3.5500 0.0700  
vdw 914 3.5500 0.0700  
vdw 915 3.5500 0.0700  
vdw 916 2.4200 0.0300  
vdw 917 3.5500 0.0700  
vdw 919 3.3000 0.1700  
vdw 920 3.5000 0.0660  
vdw 921 3.5500 0.0700  
vdw 922 2.4200 0.0300  
vdw 923 2.4200 0.0300  
vdw 924 2.5000 0.0300  
vdw 925 2.5000 0.0300  
vdw 926 2.5000 0.0300  
vdw 927 2.5000 0.0300



vdw 928 2.5000 0.0300  
vdw 929 3.5000 0.0660  
vdw 930 3.5000 0.0660

charge 907 1.120  
charge 908 -0.544  
charge 909 -0.382  
charge 910 0.262  
charge 911 -0.552  
charge 912 0.097  
charge 913 0.038  
charge 914 -0.231  
charge 915 0.146  
charge 916 0.217  
charge 917 -0.141  
charge 919 0.144  
charge 920 -0.276  
charge 921 -0.161  
charge 922 0.180  
charge 923 0.166  
charge 924 0.1545  
charge 925 0.053  
charge 926 0.1225  
charge 929 -0.179  
charge 930 -0.428  
charge 748 0.247

bond 1 120 400. 1.4134  
bond 57 120 300. 1.5474  
bond 86 86 385. 1.4936  
bond 121 86 385. 1.4131  
bond 121 57 385. 1.3930  
bond 121 87 546. 1.4137  
bond 84 87 546. 1.3899  
bond 87 87 469. 1.4162  
bond 57 84 427. 1.3746  
bond 84 13 317. 1.4967  
bond 87 13 317. 1.5003  
bond 48 86 469. 1.4081  
bond 48 48 469. 1.3787  
bond 48 122 469. 1.4337  
bond 44 122 481. 1.3591  
bond 13 44 382. 1.4725

angle 1 120 1 80. 110.  
angle 1 120 57 80. 110.  
angle 57 120 57 80. 104.  
angle 84 57 120 30. 121.  
angle 87 84 87 0. 106.  
angle 84 86 84 63. 117.  
angle 84 86 86 63. 121.  
angle 87 87 13 63. 122.  
angle 86 121 87 70. 132.  
angle 87 121 57 70. 108.  
angle 121 57 120 30. 121.  
angle 87 121 87 70. 106.

angle 121 86 121 63. 117.  
angle 121 86 86 63. 121.  
angle 57 121 86 70. 121.  
angle 121 57 84 70. 109.  
angle 121 87 87 70. 107.  
angle 13 87 121 70. 125.  
angle 48 86 49 35. 120.  
angle 121 86 49 63. 121.  
angle 122 48 48 63. 120.  
angle 48 122 48 63. 120.  
angle 122 48 49 35. 120.  
angle 44 122 48 70. 120.  
angle 13 44 122 50. 116.

restrain-torsion 121 86 86 48 1.0 87 93

torsion 1 120 57 84 0.000 0.0 1 7.170 180.0 2 0.000 0.0 3  
torsion 57 120 57 84 0.000 0.0 1 7.170 180.0 2 0.000 0.0 3  
torsion 84 87 87 49 0.000 0.0 1 7.170 180.0 2 0.000 0.0 3  
torsion 49 87 87 13 0.000 0.0 1 7.170 180.0 2 0.000 0.0 3  
torsion 84 87 87 13 0.000 0.0 1 7.170 180.0 2 0.000 0.0 3  
torsion 121 87 87 84 0.000 0.0 1 7.170 180.0 2 0.000 0.0 3  
torsion 57 121 86 86 0.000 0.0 1 7.170 180.0 2 0.000 0.0 3  
torsion 86 86 121 87 0.000 0.0 1 2.170 180.0 2 0.000 0.0 3  
torsion 57 121 86 121 0.000 0.0 1 7.170 180.0 2 0.000 0.0 3  
torsion 87 121 86 121 0.000 0.0 1 7.170 180.0 2 0.000 0.0 3  
torsion 87 121 57 84 0.000 0.0 1 7.170 180.0 2 0.000 0.0 3  
torsion 87 87 121 86 0.000 0.0 1 7.170 180.0 2 0.000 0.0 3  
torsion 86 121 87 87 0.000 0.0 1 7.170 180.0 2 0.000 0.0 3  
torsion 86 121 87 13 0.000 0.0 1 7.170 180.0 2 0.000 0.0 3  
torsion 57 121 87 87 0.000 0.0 1 7.170 180.0 2 0.000 0.0 3  
torsion 57 121 87 13 0.000 0.0 1 7.170 180.0 2 0.000 0.0 3  
torsion 121 57 120 1 0.000 0.0 1 7.170 180.0 2 0.000 0.0 3  
torsion 121 86 86 48 0.000 0.0 1 2.170 180.0 2 0.000 0.0 3  
torsion 57 120 57 121 0.000 0.0 1 7.170 180.0 2 0.000 0.0 3  
torsion 120 57 121 87 0.000 0.0 1 7.170 180.0 2 0.000 0.0 3  
torsion 120 57 121 86 0.000 0.0 1 7.170 180.0 2 0.000 0.0 3  
torsion 49 87 87 121 0.000 0.0 1 7.170 180.0 2 0.000 0.0 3  
torsion 86 121 57 84 0.000 0.0 1 7.170 180.0 2 0.000 0.0 3  
torsion 49 48 86 49 0.000 0.0 1 7.250 180.0 2 0.000 0.0 3  
torsion 48 48 86 49 0.000 0.0 1 7.250 180.0 2 0.000 0.0 3  
torsion 48 48 122 48 0.000 0.0 1 7.250 180.0 2 0.000 0.0 3  
torsion 44 122 48 49 0.000 0.0 1 7.250 180.0 2 0.000 0.0 3  
torsion 13 44 122 48 -7.582 0.0 1 3.431 180.0 2 3.198 0.0 3  
torsion 46 13 44 122 0.000 0.0 1 0.000 180.0 2 0.560 0.0 3  
torsion 48 48 122 49 0.000 0.0 1 7.250 180.0 2 0.000 0.0 3  
torsion 48 48 122 44 0.000 0.0 1 7.250 180.0 2 0.000 0.0 3  
torsion 48 122 48 49 0.000 0.0 1 7.250 180.0 2 0.000 0.0 3
